## RESEARCH ARTICLE

# Proportions and determinants of successful surgical repair of obstetric fistula in low- and middle-income countries: A systematic review and meta-analysis

Liknaw Bewket Zeleke<sup>1,2\*</sup>, Alec Welsh<sup>2</sup>, Gedefaw Abeje<sup>3</sup>, Marjan Khejahei<sup>2,4,5,6</sup>

**1** College of Health Sciences, Debre Markos University, Debre Markos, Ethiopia, **2** Faculty of Medicine, School of Women's and Children's Health, University of New South Wales Sydney, Kensington, Australia, **3** School of Public Health, College of Medicine and Health Sciences, Bahir Dar University, Bahir Dar, Ethiopia, **4** Women's and Newborn Health, Westmead Hospital, Westmead, New South Wales, Australia, **5** Westmead Clinical School, University of Sydney, Sydney, Australia, **6** Western Sydney University, Sydney, Australia

\* [l.zeleke@unsw.edu.au](mailto:l.zeleke@unsw.edu.au)

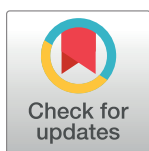

## OPEN ACCESS

**Citation:** Zeleke LB, Welsh A, Abeje G, Khejahei M (2024) Proportions and determinants of successful surgical repair of obstetric fistula in low- and middle-income countries: A systematic review and meta-analysis. *PLoS ONE* 19(5): e0303020. <https://doi.org/10.1371/journal.pone.0303020>

**Editor:** Ganesh Dangal, National Academy of Medical Sciences, NEPAL

**Received:** January 15, 2024

**Accepted:** April 17, 2024

**Published:** May 9, 2024

**Peer Review History:** PLOS recognizes the benefits of transparency in the peer review process; therefore, we enable the publication of all of the content of peer review and author responses alongside final, published articles. The editorial history of this article is available here: <https://doi.org/10.1371/journal.pone.0303020>

**Copyright:** © 2024 Zeleke et al. This is an open access article distributed under the terms of the [Creative Commons Attribution License](https://creativecommons.org/licenses/by/4.0/), which permits unrestricted use, distribution, and reproduction in any medium, provided the original author and source are credited.

**Data Availability Statement:** The data supporting this study have been submitted as [Supporting information](#) (S5 excel sheet).

## Abstract

### Background

Obstetric fistula is a serious and debilitating problem resulting from tissue necrosis on the reproductive and urinary and/or lower gastrointestinal tract organs due to prolonged labor. Primary studies of the treatment of obstetric fistulae report significantly variable treatment outcomes following surgical repair. However, no systematic review and meta-analysis has yet estimated the pooled proportion and identified the determinants of successful obstetric fistula surgical repair.

### Objective

To estimate the proportion and identify the determinants of successful surgical repair of obstetric fistulae in low- and middle-income countries.

### Methods

The protocol was developed and registered at the International Prospective Register of Systematic Reviews (ID CRD42022323630). Searches of PubMed, Embase, CINAHL, Scopus databases, and gray literature sources were performed. All the accessed studies were selected with Covidence, and the quality of the studies was examined. Finally, the data were extracted using Excel and analyzed with R software.

### Results

This review included 79 studies out of 9337 following the screening process. The analysis reveals that 77.85% (95%CI: 75.14%; 80.56%) of surgical repairs in low and middle-income countries are successful. Women who attain primary education and above, are married, and have alive neonatal outcomes are more likely to have successful repair outcomes. In

**Funding:** The author(s) received no specific funding for this work.

**Competing interests:** The authors have declared that no competing interests exist.

contrast, women with female genital mutilation, primiparity, a large fistula size, a fistula classification of II and above, urethral damage, vaginal scarring, a circumferential defect, multiple fistulae, prior repair and postoperative complications are less likely to have successful repair outcomes.

## Conclusion

The proportion of successful surgical repairs of obstetric fistula in low and middle-income countries remains suboptimal. Hence, stakeholders and policymakers must design and implement policies promoting women's education. In addition, fistula care providers need to reach and manage obstetric fistula cases early before complications, like vaginal fibrosis, occur.

## Background

A fistula is an abnormal passageway that connects two organs or vessels that do not connect normally. Obstetric fistula refers to a fistula that occurs between reproductive tract organs (the vagina, cervix, and uterus), and lower urinary tract (bladder, urethra, and pelvic ureters) and/or lower gastrointestinal organs (rectum and anus) resulting from prolonged and/or obstructed labor or operative injury. This debilitating problem mainly occurs due to prolonged labor that causes tissue damage through tissue necrosis, leaving patients incontinent for both urine and feces. However, other risk factors such as lower gynecologic age, malnutrition, female genital mutilation, and living far from health facilities also contribute to the occurrence of obstetric fistula [1–5].

Obstetric fistula affects between 50,000 to 100,000 women worldwide each year and it is estimated that around two million women live with untreated obstetric fistula in Asia and Sub-Saharan Africa. It affects women at any age, but nearly half of the patients are youths aged between 10 and 19 years. The problem can be prevented by increasing access to high-quality maternal health care services, mainly access to safe perinatal care and childbirth services, improving the wealth status of the community, and by community education to avoid poor practices (early marriage, female genital mutilation, and home birth). Obstetric fistula been eliminated in the developed world by the improvement of access to maternal healthcare services [6–10].

Obstetric fistula is both a preventable and treatable public health problem. However, the majority of women with obstetric fistulae do not seek treatment due to multiple factors such as lack of awareness of treatment services, lack of access to transportation and the financial cost for the services, trying home remedies, and fear of stigma and social isolation. Treatment strategies for obstetric fistula may take the form of conservative treatment, surgical repair, physiotherapy, rehabilitation, or social reintegration techniques, depending on the severity of the fistula. Surgical repair aims to stop the incontinence, whereas the other treatment modalities aim to restore the patients' psychological well-being and reintegrate them into their families and society [8,11–17].

For surgical repair of the obstetric fistula, a successful treatment outcome refers to the successful closure of the fistula and cessation of the incontinence. Many individual studies have been published on the surgical repair outcomes of obstetric fistulae with a significant variation in the findings reported, ranging from a 42.5% [18] to 100% [19] closure rate, and a 39.66%

[20] to 90.1% [21] continence rate. According to the literature, the site, size, type and classification of the fistula, as well as the presence of scarring, surgeon's experience, previous attempts, type of repair technique, and duration of living with the fistula were the main determinants of the repair outcomes [22–24]. However, very few [25,26] systematic review and meta-analysis studies have been conducted on successful surgical repair outcomes and determinants of obstetric fistula but none of them covered low- and middle-income countries comprehensively. Investigating the pooled prevalence of successful treatment outcomes and determinant factors will help policymakers and program designers develop programs and guidelines to improve healthcare services for obstetric fistula patients. It will also give the scientific community an overview of obstetric fistula repair outcomes in low- and middle-income countries.

## Objective

This systematic review and meta-analysis study aims to estimate the pooled proportion of successful surgical repair outcomes of obstetric fistulae and determinants of the outcomes in low- and middle-income countries.

## Review questions

What is the pooled proportion of successful surgical obstetric fistula repair outcomes in low- and middle-income countries?

What are the determinants of successful surgical obstetric fistula repair outcomes in low- and middle-income countries?

## Methods

### Protocol design and registration

The title of the review was registered at the International Prospective Register of Systematic Reviews (PROSPERO) with registration ID CRD42022323630 on May 10, 2022. A protocol was developed, based on the Joanna Briggs Institute (JBI) evidence synthesis updated methodological guidelines for the conduct of systematic reviews and meta-analysis, and reported according to the Preferred Reporting Items for Systematic Review and Meta-analysis Protocols (PRISMA-P) [27] guidelines.

### Eligibility criteria

The inclusion and exclusion criteria were determined using the CoCoPop (condition, context, and population) framework, which JBI recommends for determining pooled prevalence and incidence for observational studies [28]. Accordingly, the *condition* refers to successful obstetric fistula surgical repair outcomes, *context* refers to low- and middle-income countries, and *population* refers to women who underwent surgical repair for obstetric fistula. The POE (population, outcome, and exposure) framework was considered in searching for studies on the determinants of obstetric fistula. The *exposure* in this context refers to the individual variables associated with the *outcome* variable, which is successful (yes/no) surgical repair of obstetric fistula.

All studies that reported treatment outcomes (either successful or unsuccessful) and/or determinants of obstetric fistulae, irrespective of publication status and year, were considered in the review. However, the review was limited to studies available in the English language and in low- and middle-income countries based on the World Health Organization (WHO) classification. More specifically, systematic reviews, case reports, case series, qualitative studies,

articles without full text, studies that involved non-obstetric fistula participants and studies from developed countries were excluded from this study.

### Search strategy and study selection

The search was conducted on databases and gray literature to access published and unpublished studies, including dissertations and preprints. The databases searched were PubMed, Embase, CINAHL, and Scopus, whereas Google Scholar and direct Google search were considered for the searching of gray literature. In addition, the first author contacted corresponding authors via publicly available ResearchGate accounts to access the full text of the abstracts that did not have full text, and one author [29] provided the full text of his article. Finally, the search was expanded by forward and backward citation searching to avoid missing relevant studies. The search was mainly conducted from June 19–20, 2023, and was open for continuous updates to include relevant new publications thereafter.

**Search terms.** Systematic searching was conducted after the identification of the domains of search terms according to the CoCoPop framework by taking successful outcomes of obstetric fistula surgical repair as conditions, low- and middle-income countries as context, and women who underwent surgical repair for obstetric fistula as the population. Initially, keywords were identified by breaking down the topic, then subject heading terms were explored, according to the nature of the databases. Finally, the keywords, subject heading terms, and free texts were combined to organize the search terms. Search terms within a similar domain were combined using the Boolean operator “OR” whereas the Boolean operator “and” was used to combine search terms from different domains. Truncation of words by an asterisk (\*) was also applied to find words with various endings having the same root word. The details of the combinations of the search terms used in each database are attached *S1 text*.

**Study selection.** All the accessed studies underwent a selection process according to the PRISMA flow chart (Appendix 2). The screening process was conducted using the Covidence screening tool. Initially, duplicated studies were removed, followed by screening of the title and abstract of the non-duplicated studies for their eligibility to be transferred to full-text review. Finally, relevant studies were identified via full-text review.

### Data extraction

The first author and the last author extracted the data to an Excel spreadsheet. The second author was invited to intervene in any disagreement between the two authors during data extraction. The data extraction spreadsheet contained the authors' names, publication year, study setting (country), study design, sampling technique, data collection method, data retrieval period, type of fistula, route of surgery, assessment period, event, and sample size of each included study. Then, relevant calculations such as the proportion of successful treatment outcomes, standard deviation, and standard error were generated through calculations made on the data extraction spreadsheet.

### Study quality and risk-of-bias assessment

The methodological quality of the selected studies was appraised at the study level using the JBI critical appraisal tools recommended for each study design [28,30]. Therefore, this review utilized the JBI critical appraisal tools designed for prevalence studies, analytical cross-sectional studies, cohort studies, case-control studies and randomized controlled trial studies. Two authors conducted the quality appraisal and scored the ratings independently as per the nature of the quality assessment tool. A third author also participated in quality appraisal upon request to resolve disagreements between the two authors.

**Risk of bias for individual studies.** The quality of studies assessed using JBI critical appraisal tools were rated as “Yes”, “No”, “Unclear” or “Not Applicable”. Likewise, the quality of the randomized trial, which was evaluated using the Cochrane Collaboration tool, was rated as “high”, “low” or “unclear” [31,32]. Finally, the rates were converted into percentages to categorize the risk of bias in each study. The quality of the included studies was classified as low quality (score  $\leq 49\%$ ), moderate quality (score 50–69%), and high quality (Score  $\geq 70$ ) (106, 107).

**Risk of bias across studies.** Publication bias was assessed during the analysis graphically using a funnel plot and statistically using Egger and Begg tests. Furthermore, sensitivity analyses were conducted, which excluded outlier studies, studies with small sample sizes ( $n < 100$ ), and studies that did not specify the fistula type and repair route.

## Data management and analysis

After completing the extraction, the data were transferred to R software for further management and analysis. The characteristics of the included studies were presented using descriptive statistics, tables, and figures. In addition, the statistical and figurative displays were supplemented with narrative descriptions. The pooled proportion of successful surgical repair outcomes of obstetric fistula was determined using the appropriate estimation model after the heterogeneity test and is presented using a forest plot.

The heterogeneity between the included studies was checked by a Cochran’s Q test, quantified by the  $I^2$  statistic value to choose either a random effect or fixed effect model. The presence of heterogeneity was confirmed when the probability value of the Cochran’s Q test was less than 0.05. In addition, the quantified  $I^2$  value (percentage) was interpreted as either low (below 30–40%), moderate (30–60%), considerably high (50–90%), or highly heterogeneous (75–100%) [33]. If the  $I^2$  indicated the presence of heterogeneity, the random effect analysis was chosen, whereas the fixed effect model was considered for low and no heterogeneity. The source of heterogeneity was further examined through subgroup analysis and meta-regression. Finally, factors with a  $p$ -value of 0.05 with 95% confidence interval were declared statistically significant determinants.

## Results

### Study selection

The initial search yielded 9337 studies (9249 from database search and 88 from gray literature). Then, 2334 duplicate studies were excluded, and 6540 studies were removed by title and abstract review, leaving 410 studies to be retrieved. Following the retrieval, 122 studies were assessed for eligibility, and finally, 79 studies were included in this review (Fig 1).

### Study characteristics

All the included studies were published articles with the publication year within the years 1971 to 2023 [15,18,20,21,24,29,34–106]. Of the included studies, 75 used data gathered from single countries, whereas four studies involved data from multiple countries, and more than one-quarter (eighteen) of the included studies were from Ethiopia. The review covered three WHO regions, namely Africa (56 studies), South-East Asia (eleven studies), Eastern Mediterranean (ten studies), and two studies involved data gathered from both South-East Asia and Africa. In terms of study design, nearly half (39) of the included studies were retrospective cross-sectional studies. Furthermore, most (72) of the included studies used surveys instead of sampling. A substantial number of studies did not specify some of the study characteristics such as

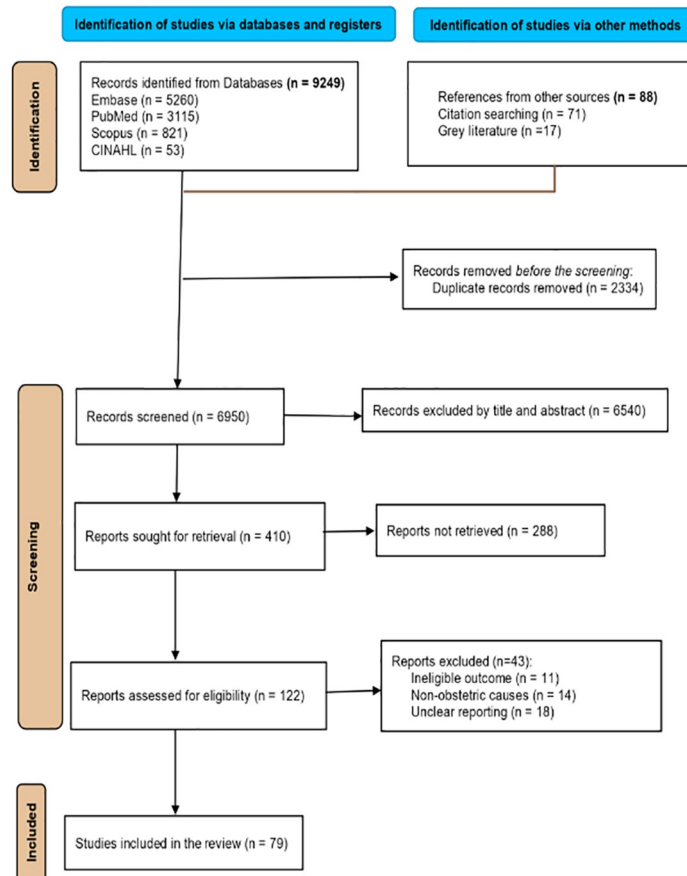

**Fig 1. PRISMA flow diagram.** This PRISMA flow diagram indicates the study screening process of the systematic review generated by Covidence software.

<https://doi.org/10.1371/journal.pone.0303020.g001>

the data retrieval period (six studies), surgery route (26 studies), fistula type (eight studies), and outcome assessment period (nine studies). Finally, the pooled proportion of successful surgical repair of obstetric fistulae was estimated using data extracted from 77 studies; whereas the determinants were identified using data extracted from 28 studies. The detailed characteristics of the included studies have been presented in [S1 Table](#).

### Risk of bias in studies

The risk of bias in each included study was assessed using the JBI critical appraisal tools appropriate for the design of the studies. The scores were converted into percentages to classify the risk of bias in each study into low, moderate, and high. The level of risk of bias for each study was valued inversely to the assigned study quality, i.e., studies with low quality were considered as having a high risk of bias, and studies with high quality were regarded as having a low risk of bias. Accordingly, 57 and 22 studies had a low and moderate risk of bias, respectively, and none of the included studies were rated to have a high risk of bias as presented in [S2 Table](#).

**Proportion of successful surgical repair outcomes of obstetric fistula.** Following the selection and quality appraisal phases, 79 studies were transferred to the systematic review and meta-analysis phases to determine the pooled proportion of successful surgical repairs of obstetric fistulae and to identify the determinants of successful surgical repair. The minimum

proportion of successful recovery, 36%, was reported by Heller et al. [59] in Niger, and a 100% recovery was reported by Sharma et al. [46] in India. The pooled proportion of successful surgical repair of obstetric fistula was determined by meta-analysis among 76 studies, excluding the study by Sharma et al. [46] to avoid the undue outlier effect of 100% recovery. Therefore, the meta-analysis was conducted among a total of 25,664 observations, with a sample size per study ranging from 23 [90] to 2,360 [101]. The model of analysis was chosen after examining the heterogeneity test values (Fig 2).

*Heterogeneity test.* The presence of heterogeneity between the included studies was examined using Cochran's Q statistic and  $I^2$  test values. Accordingly, the  $p$ -value of the Cochran's Q statistic ( $< 0.01$ ) indicated the presence of significant between-study heterogeneity. Further quantification of the indicated heterogeneity using the  $I^2$  test value (94.1%) implied the existence of considerably high heterogeneity among the included studies. Therefore, the random-effect model was chosen to determine the pooled proportion of successful repair of obstetric fistula. This model revealed a 77.85% [95%CI: 75.14; 80.56] rate of successful surgical repair. Given the presence of considerable heterogeneity, the possible source of the heterogeneity was examined through subgroup analysis and meta-regression.

*Subgroup analysis.* The subgroup analyses were performed by stratifying the pooled proportion by selected categorical variables such as WHO region, type of fistula, and repair route. The subgroup analysis by WHO region indicated a slightly lower within-group heterogeneity in Southeast Asia and the Eastern Mediterranean regions. However, the stratification by fistula type and surgical route showed the presence of high within-group heterogeneity in all the groups. The subgroup analysis by WHO region indicated the presence of significant between-group heterogeneity. In contrast, the subgroup analyses by fistula type and surgical route demonstrated a non-significant heterogeneity between the respective groups (Table 1).

*Meta-regression.* In addition to the subgroup analyses using the categorical characteristics of the studies, the possible source of heterogeneity by continuous characteristics, particularly the publication year and sample size, was examined through meta-regression analyses. However, the analyses showed that neither variable contributed to significant heterogeneity (Table 2).

*Sensitivity analysis.* Sensitivity analyses were conducted by excluding some studies considering the following criteria: outliers [18, 59, 94], studies with small sample size ( $n < 100$ ), unspecified fistula type, and surgical route. However, none of the analyses significantly changed either the heterogeneity test or the pooled proportion of successful surgical repair (Table 3).

*Publication bias.* Possible publication bias was examined using a funnel plot, and the plot displayed an asymmetric distribution of the studies, which evidenced the presence of publication bias (Fig 3).

**Determinants of successful surgical repair outcomes of obstetric fistula.** The determinants of successful surgical repair outcomes of obstetric fistula were identified using a conceptual framework designed by Lewis Wall [107]. The framework was constructed to outline the determinants of obstetric fistula formation. Hence, the framework has been adapted with amendments to make it suitable for the aims of this review (Fig 4). A total of 27 studies were considered in the determinant identification analysis and the possible determinants of successful surgical repair were categorized into remote determinants of obstetric fistula, intermediate determinants of obstetric fistula, immediate determinants of obstetric fistula, fistula-related, and repair technique-related factors (Fig 4).

*Remote determinants of obstetric fistula.* This category mainly contains socio-demographic and cultural factors such as education, residence, occupation and income.

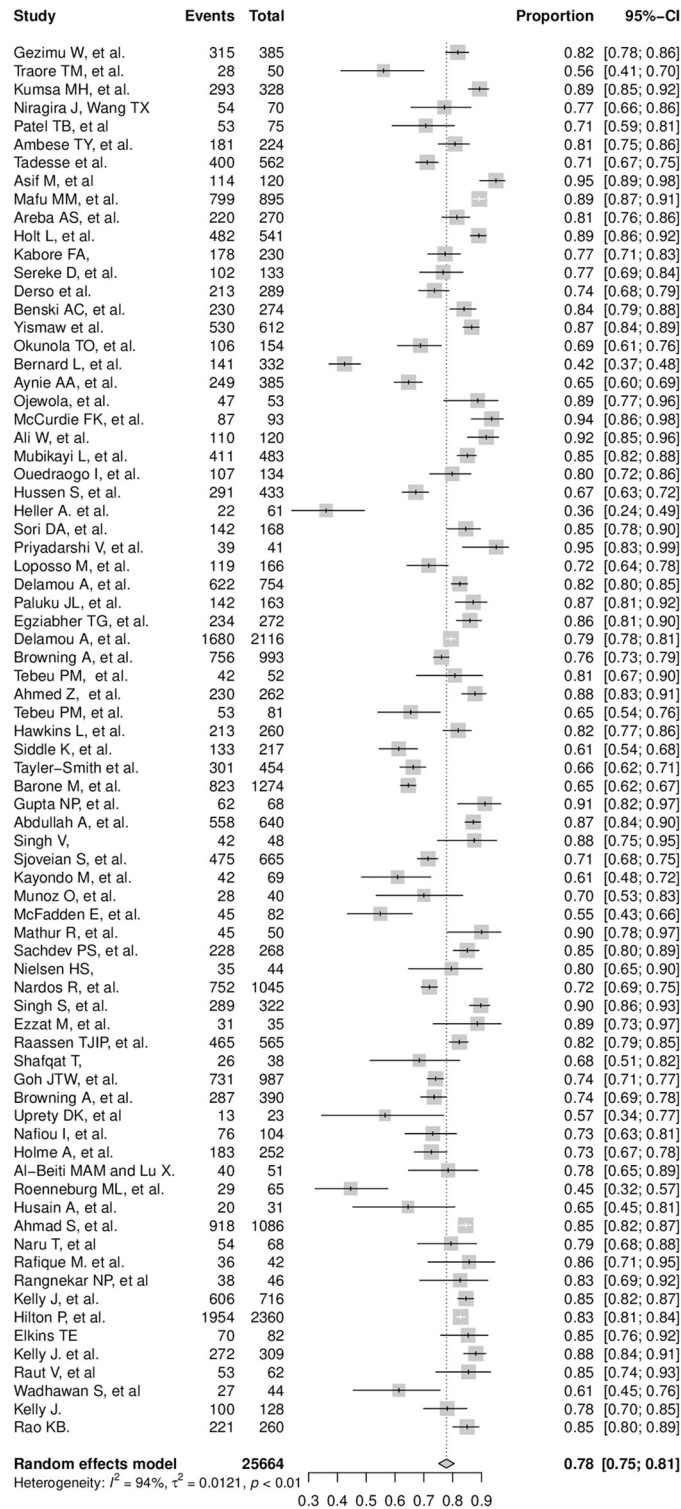

**Fig 2. Forest plot.** This forest plot indicates the pooled proportion of obstetric fistula surgical repair outcomes.

<https://doi.org/10.1371/journal.pone.0303020.g002>



**Table 1. Subgroup analysis results by WHO region, fistula type, and surgical route.**

| Variable       | Category                         | No. of studies | Proportion [95%CI] | Within-group I <sup>2</sup> | Between-group heterogeneity |         |
|----------------|----------------------------------|----------------|--------------------|-----------------------------|-----------------------------|---------|
|                |                                  |                |                    |                             | Q                           | p-value |
| WHO region     | Africa                           | 55             | 0.76 [0.73; 0.79]  | 94.3%                       | 96.91                       | < 0.01  |
|                | South-East Asia                  | 10             | 0.83 [0.77; 0.90]  | 73.7%                       |                             |         |
|                | Eastern Mediterranean            | 10             | 0.86 [0.82; 0.91]  | 75.1%                       |                             |         |
|                | South-East Asia and Africa       | 1              | 0.65 [0.62; 0.67]  | NA                          |                             |         |
| Fistula type   | VVF                              | 26             | 0.78 [0.72; 0.83]  | 94.9%                       | 3.93                        | 0.27    |
|                | VVF and RVF                      | 25             | 0.77 [0.73; 0.82]  | 94.3%                       |                             |         |
|                | Multiple                         | 17             | 0.82 [0.77; 0.86]  | 92.9%                       |                             |         |
|                | Not specified                    | 8              | 0.73 [0.60; 0.86]  | 94.4%                       |                             |         |
| Surgical route | Vaginal                          | 11             | 0.77 [0.73; 0.82]  | 84.6%                       | 9.51                        | 0.049   |
|                | Abdominal                        | 5              | 0.87 [0.75; 0.98]  | 95.1%                       |                             |         |
|                | Vaginal and abdominal            | 24             | 0.82 [0.78; 0.86]  | 83.9%                       |                             |         |
|                | Vaginal, abdominal, and combined | 10             | 0.75 [0.63; 0.86]  | 93.1%                       |                             |         |
|                | Not specified                    | 26             | 0.75 [0.69; 0.80]  | 96.0%                       |                             |         |

<https://doi.org/10.1371/journal.pone.0303020.t001>

**Table 2. Meta-regression results by publication year and sample size.**

| Variable         | I <sup>2</sup> | R <sup>2</sup> | Heterogeneity Test (Q [p-value]) | Model Results             |           |
|------------------|----------------|----------------|----------------------------------|---------------------------|-----------|
|                  |                |                |                                  | (Estimate [95% CI])       | (p-value) |
| Publication Year | 96.42%         | 0.00%          | 1276.54 [< 0.01]                 | -0.0004 [-0.0031, 0.0023] | 0.57      |
| Sample size      | 96.32%         | 0.00%          | 1273.14 [< 0.01]                 | 0.0000 [-0.0001, 0.0001]  | 0.63      |

<https://doi.org/10.1371/journal.pone.0303020.t002>

**Table 3. Sensitivity analysis results by outliers, small sample size, unspecified fistula type and surgical route.**

| Exclusion criteria         | I <sup>2</sup> | Heterogeneity Test (Q [p-value]) | Model                | Pooled proportion [95% CI] |
|----------------------------|----------------|----------------------------------|----------------------|----------------------------|
| Outliers                   | 92.7%          | 984.42 [< 0.01]                  | Random effect        | 0.79 [0.77; 0.82]          |
| Small sample size          | 95.5%          | 1041.18 [< 0.01]                 | Random effect        | 0.79 [0.76; 0.82]          |
| Unspecified fistula type   | 94.2%          | 1148.71 [< 0.01]                 | Random effect        | 0.78 [0.76; 0.81]          |
| Unspecified surgical route | 90.8%          | 530.72 [< 0.01]                  | Random effect        | 0.80 [0.77; 0.83]          |
| <b>No studies excluded</b> | <b>94.4%</b>   | <b>1170.78 [&lt; 0.01]</b>       | <b>Random effect</b> | <b>0.78 [0.75; 0.81]</b>   |

<https://doi.org/10.1371/journal.pone.0303020.t003>

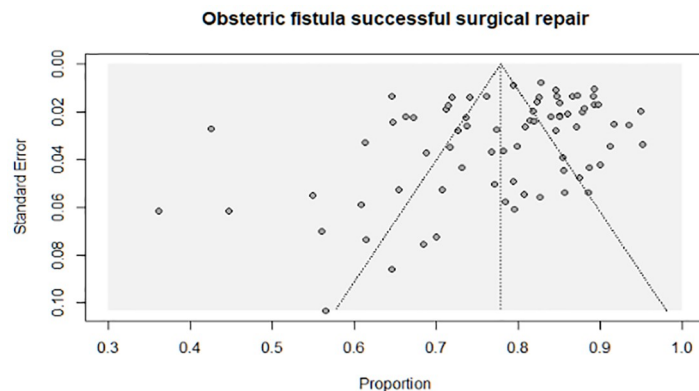

**Fig 3. A scatter plot.** This scatter diagram indicates the publication-bias distribution.

<https://doi.org/10.1371/journal.pone.0303020.g003>

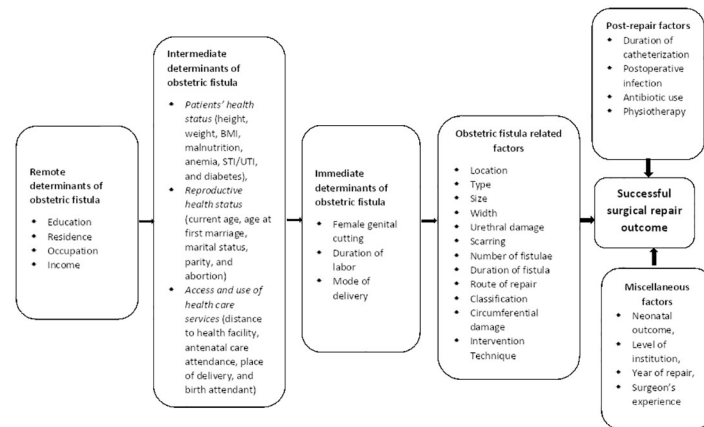

**Fig 4. A conceptual framework.** This conceptual framework shows the determinants of successful surgical repair outcomes of obstetric fistula [107].

<https://doi.org/10.1371/journal.pone.0303020.g004>

*Intermediate determinants of obstetric fistula.* Includes the patients' health status (height, weight, BMI, malnutrition, anemia, sexually transmitted infections/urinary tract infection, and diabetes), reproductive status (current age, age at first marriage, marital status, parity, and abortion), access and use of health care services (distance to health facility, antenatal care attendance, place of delivery, and birth attendant).

*Immediate determinants of obstetric fistula.* The duration of labor and mode of delivery are the immediate factors according to the studies included in the systematic review.

*Fistula-related factors.* The location, type, size, width, urethral damage, scarring, number of fistulae, duration of fistula, route of repair, fistula classification, circumferential damage, and intervention technique are the fistula-related factors that might determine the successful surgical repair outcome.

*Post-repair factors.* These occur following the surgical repair of obstetric fistulae and include the duration and type of catheterization, postoperative infection, antibiotic use and physiotherapy.

*Miscellaneous factors.* This review identified some factors, namely neonatal outcome, level of institution, year of repair, and surgeon's experience, that are reported by the included studies as possible determinants of obstetric fistula surgical outcome. Given that these factors do not fit under the categories mentioned above, this review presents them as miscellaneous factors. Eligible factors that appeared in studies with consistent units of measurement or category were transferred to the meta-analysis. Therefore, the meta-analysis was conducted on age, height, marital status, education, residence, presence of comorbidity, female genital mutilation, parity, place of delivery, mode of delivery, labor duration, neonatal outcome, fistula type, fistula size, fistula classification, urethral damage, vaginal scarring, circumferential defect, multiple fistulae, route of repair, prior repair, and postoperative complications.

The meta-analysis indicated that successful surgical repair outcome of the obstetric fistula was significantly associated with marital status, female genital mutilation, parity, labor duration, neonatal outcome, fistula size, fistula classification, urethral damage, vaginal scarring, circumferential defect, multiple fistula, prior repair, and postoperative complications. An appropriate model of analysis was chosen for each factor after examining the heterogeneity test (Table 4).

*Remote determinants of obstetric fistula.* Based on the findings, the level of education showed positive association with the occurrence of successful fistula repair, while place of residence, occupation and income did not show a significant association at a 95% confidence

**Table 4. Determinants of successful surgical repair outcomes of obstetric fistula in low- and middle-income countries.**

| Variable (category)                                | OR [95% CI]                   | Model          | Heterogeneity test |                          |
|----------------------------------------------------|-------------------------------|----------------|--------------------|--------------------------|
|                                                    |                               |                | I <sup>2</sup> %   | Q (p-value)              |
| Age in years [40,48,51,77]                         |                               |                |                    |                          |
| >20                                                | 1                             | Random effects | 62.3               | 5.30 (0.07)              |
| <20                                                | 1.17 [0.47, 2.90]             |                |                    |                          |
| Height in CM [34,36,48,49]                         |                               |                |                    |                          |
| >150                                               | 1                             | Random effect  | 64.0               | 8.33 (0.04)              |
| ≤150                                               | 1.28 [0.66, 2.45]             |                |                    |                          |
| Marital status [18,36,44,52,62,69]                 |                               |                |                    |                          |
| Unmarried                                          | 1                             | Fixed effect   | 0.0                | 0.99 (0.96)              |
| Married                                            | 1.44 [1.14, 1.83]*            |                |                    |                          |
| Education [18,34,36,48,52,62,69,71]                |                               |                |                    |                          |
| No formal education                                | 1                             | Fixed effect   | 21.2               | 7.61 (0.27)              |
| Primary and above                                  | 1.80 [1.44, 2.26]*            |                |                    |                          |
| Residence [36,39,48,52,62,71]                      |                               |                |                    |                          |
| Urban                                              | 1                             | Random effect  | 64.9               | 13.47 (0.02)             |
| Rural                                              | 0.82 [0.52, 1.28]             |                |                    |                          |
| Presence of comorbidity [44,49,66,71]              |                               |                |                    |                          |
| No                                                 | 1                             | Fixed effect   | 0.0                | 2.20 (0.53)              |
| Yes                                                | 0.87 [0.63, 1.21]             |                |                    |                          |
| Genital mutilation [39,49,71,76,77]                |                               |                |                    |                          |
| No                                                 | 1                             | Random effect  | 49.2               | 7.88 (0.10) <sup>a</sup> |
| Yes                                                | 0.50 [0.32, 0.78]*            |                |                    |                          |
| Parity [21,36,39,40,49,52,64,74,77]                |                               |                |                    |                          |
| Multipara                                          | 1                             | Fixed effect   | 0.0                | 7.94 (0.44)              |
| Primipara                                          | 0.63 [0.53, 0.76]*            |                |                    |                          |
| Delivery place[21,34,36,39,48,49,52]               |                               |                |                    |                          |
| Home                                               | 1                             | Random effect  | 80                 | 30.10 (<0.01)            |
| Health facility                                    | 1.61 [0.92,2.82] <sup>†</sup> |                |                    |                          |
| Mode of delivery [36,39,44,48,49,52,62,69,71,78]   |                               |                |                    |                          |
| Spontaneous Vaginal                                | 1                             | Random effect  | 43.6               | 15.97 (0.07)             |
| Cesarean section and instrumental                  | 1.03 [0.79, 1.34]             |                |                    |                          |
| Labor duration [21,36,39,40,44,48]                 |                               |                |                    |                          |
| < 48 hours                                         | 1                             | Random effect  | 82.3               | 28.19 (<0.01)            |
| ≥ 48 hours                                         | 0.57 [0.34, 0.95]*            |                |                    |                          |
| Neonatal outcome [36,39,40,44,49,62,69]            |                               |                |                    |                          |
| Stillbirth                                         | 1                             | Fixed effect   | 34.9               | 9.22 (0.16) <sup>b</sup> |
| Alive                                              | 2.3 [1.68, 3.13]*             |                |                    |                          |
| Fistula type [15,24,36,39,40,44,64]                |                               |                |                    |                          |
| Vesicovaginal                                      | 1                             | Random effect  | 50.5               | 12.13 (0.06)             |
| Rectovaginal and mixed                             | 0.96 [0.63, 1.46]             |                |                    |                          |
| Fistula size [21,34,36,37,39,40,44,53,56,71,76,88] |                               |                |                    |                          |
| ≤3 CM                                              | 1                             | Random effect  | 79.0               | 52.30 (<0.01)            |
| >3 CM                                              | 0.24 [0.17; 0.37]*            |                |                    |                          |
| Classification [21,40,44,51,52,69,74]              |                               |                |                    |                          |
| Type I                                             | 1                             | Fixed effect   | 19.3               | 7.43 (0.28)              |
| Type II and above                                  | 0.42 [0.33, 0.53]*            |                |                    |                          |

(Continued)

Table 4. (Continued)

| Variable (category)                              | OR [95% CI]        | Model         | Heterogeneity test |               |
|--------------------------------------------------|--------------------|---------------|--------------------|---------------|
|                                                  |                    |               | I <sup>2</sup> %   | Q (p-value)   |
| Urethral status [34,40,48,62,71]                 |                    |               |                    |               |
| Intact                                           | 1                  | Fixed effect  |                    |               |
| Partially and totally damaged                    | 0.37 [0.31, 0.45]* |               | 6.7                | 4.29 (0.37)   |
| Vaginal scarring [21,37,39,40,51,56,62,71,76,77] |                    |               |                    |               |
| Mild                                             | 1                  | Random effect |                    |               |
| Moderate to severe                               | 0.30 [0.16; 0.56]* |               | 88.0               | 74.78 (0.00)  |
| Circumferential defect [34,40,44,69,71,76,77]    |                    |               |                    |               |
| No                                               | 1                  | Random effect |                    |               |
| Yes                                              | 0.30 [0.20, 0.44]* |               | 60.2               | 15.06 (0.02)  |
| Multiple fistula [40,53,71,74,78]                |                    |               |                    |               |
| No                                               | 1                  | Random effect |                    |               |
| Yes                                              | 0.25 [0.13, 0.48]* |               | 68.9               | 12.85 (<0.01) |
| Route of repair [36,37,44,52,53,64,73,74,78]     |                    |               |                    |               |
| Vaginal                                          | 1                  | Random effect |                    |               |
| Abdominal and mixed                              | 0.89 [0.68; 1.15]  |               | 38.9               | 13.08 (0.09)  |
| Prior repair [24,39,52,53,56,64,69–71,74,76–78]  |                    |               |                    |               |
| No                                               | 1                  | Random effect |                    |               |
| Yes                                              | 0.43 [0.35, 0.53]* |               | 42.1               | 20.73 (0.05)  |
| Postop complications [21,44,52,62]               |                    |               |                    |               |
| No                                               | 1                  | Fixed effect  |                    |               |
| Yes                                              | 0.40 [0.2, 0.60]*  |               | 0.0                | 0.62 (0.89)   |

<sup>a</sup> Random effect model has been selected considering the I<sup>2</sup> despite the p-value of Q being > 0.05,

<sup>b</sup> Fixed effect has been selected considering the p-value of Q despite the I<sup>2</sup> showing minimal heterogeneity,

\* Significantly associated with p-value < 0.05.

<sup>†</sup> p-value of fixed effect model < 0.05.

<https://doi.org/10.1371/journal.pone.0303020.t004>

interval level. The odds ratio for the level of education was calculated using data obtained from eight studies. Accordingly, women who attained an educational level of primary and above were 80% (OR 1.80 [95% CI; 1.44, 2.26]) more likely to have successful surgical repair than women with no formal education.

*Intermediate determinants of obstetric fistula.* Married women were 44% (OR 1.44 [95% CI; 1.14, 1.83]) more likely to have successful surgical repair outcomes than women whose marital status was single, divorced, or widowed.

*Immediate determinants of obstetric fistula.* Women who had genital mutilation during childhood were 50% (OR 0.50 [95% CI; 0.32, 0.78]) less likely to attain successful surgical repair relative to women who had no genital cutting. Primipara women were 37% (OR 0.63 [95% CI; 0.53, 0.76]) less likely to have successful surgical repair than multipara women. Similarly, women with a longer duration of labor, particularly greater than two days and above, had 43% (OR 0.57 [95% CI; 0.34, 0.95]) less likely successful surgical repair outcomes than their counterparts.

*Fistula-related factors.* From fistula-related factors, women with larger fistula sizes (> 3cm) were 76% less likely to achieve successful surgical repair outcomes than women with small fistulae. Likewise, women whose fistulae were classified as type II and above based on Goh [21,38,42] and Waaldijk [49,50,67,74] classification methods were 58% less likely to have

successful surgical repair outcome than women with type I fistulae. Patients whose urethral status was partially or totally damaged were 63% less likely to achieve successful surgical repair than a patient who had an intact urethra. The study also revealed that patients with a moderate to severe forms of vaginal scarring were 73% less likely to have successful surgical repair outcomes than patients with mild scarring. In addition, patients with circumferential defects were also 70% less likely to have successful surgical repair outcomes than those without. Concerning the number of fistulae, women with multiple fistulae were 75% less likely to have successful repair outcomes than a woman with a single fistula. The study also demonstrated that patients with prior repair were 57% less likely to have successful surgical repair outcomes than patients undergoing the surgical repair for the first time.

*Postoperative and miscellaneous factors.* Patients with postoperative complications were 60% less likely to have successful surgical repair than patients without complications.

*Miscellaneous factors.* Patients who gave birth to a live neonate had a 2.3 times (OR 2.3 [95% CI; 1.68, 3.13]) more likely successful repair outcome than patients with stillbirth when the fistula occurred.

## Discussion

This systematic review and meta-analysis presents the review findings of 79 studies, of which 77 were used to determine the pooled proportion of successful surgical repair outcomes, and 28 were used to identify the determinants of successful obstetric fistula repair in low- and middle-income countries. The review included studies that measured the successful treatment of obstetric fistulae in terms of successful closure of the fistula and urinary and/or fecal continence achievement following the surgical repair.

The reviewed studies showed a substantially variable repair rate ranging from 36% [59] to 100% [46], which supported the necessity of determining the pooled proportion of obstetric fistula successful surgical repair through meta-analysis. Therefore, this study determined the pooled proportion and revealed a successful surgical repair outcome of 77.85% [95% CI: 75.14; 80.56] for obstetric fistulae in low and middle-income countries. This finding is higher than the finding of a systematic review and meta-analysis study [26] conducted by Kumsa et al. that determined the rate of successful obstetric fistula in Africa. This finding is also relatively comparable with another systematic review and meta-analysis by Ejigu et al. that gave a successful repair outcome of 73.11% in East Africa [25]. The current study's finding lies within the 95% confidence interval of Ejigu et al.'s study; however, our study confidence interval excludes the estimated proportion of the study mentioned above. This discrepancy might be due to the confidence interval variation of the two studies, secondary to the difference in the number of the included studies and in turn, the study participants. The study of Ejigu et al. was conducted among 16 studies comprising 6254 observations; the current meta-analysis estimated the pooled proportion using 25,664 observations from 76 studies. However, this study's pooled estimate is lower than the WHO standard: 85% fistula closure with 90% achieving continence [108], which implies the necessity of more coordinated and collaborative efforts toward eradicating obstetric fistula in low and middle-income countries.

This study also reviewed and identified the determinants of successful surgical repair of obstetric fistula. These determinants fall under the following themes: remote determinants of obstetric fistula, intermediate determinants of obstetric fistula, immediate determinants of obstetric fistula, fistula-related factors, and repair technique-related factors. The meta-analysis wing of this study identified that level of education, marital status, female genital mutilation, parity, neonatal outcome, fistula size, fistula classification, urethral damage, vaginal scarring, circumferential defects, multiple fistulae, prior repair and postoperative complications are

significantly associated (at 95% confidence interval level) with successful surgical repair outcomes of obstetric fistula.

Women who attained primary and above education had a better recovery outcome than those without formal education. This association might be attributed to early care-seeking behavior among women with better educational attainment [109], which prevents complications such as vaginal scarring that negatively affects successful repair outcomes.

Analysis of data from six studies [18,36,44,52,62,69] showed that married women were 44% more likely to have a successful surgical repair of obstetric fistula than their single counterparts. The positive impact of marital status on successful outcome might be justified by a husband's psychological and financial support, as indicated by studies that investigated the quality of life following the surgical repair of obstetric fistula patients [110–112]. However, none of the included studies demonstrate a significant association, clearly implying that a repeat study involving a large number of participants should be performed to investigate whether marital status determines the success of surgical repair of obstetric fistula.

The other important variable is female genital cutting. Collaborative efforts to end this practice are needed. Studies demonstrate an association between female genital cutting and obstetric fistula [107,113,114]. Even though this procedure is primarily performed during infancy and early childhood [115,116], it has a long-term health impact. This study proved that the health impacts of genital cutting persist even after surgical repair of obstetric fistula cases, resulting in poor recovery outcomes among patients with genital cutting compared with women with no genital cutting. The negative impact of this practice on the successful surgical repair of obstetric fistula might be due to the loss of elasticity in the genital parts due to scarring and fibrosis formation [117]. Women with genital cutting develop scars on the area where the excision has been performed, and this scar may hinder the wound healing process, leading to an unsuccessful repair outcome.

Regarding parity, primipara women had a lower likelihood of successful surgical repair than multipara women. This association might be attributed to the severity of the fistula [118]. Given that primipara women have no previous history of childbirth, the adequacy of the birth canal might be worse for the primipara women than for multiparas. A study in Ethiopia also reported that primipara women have longer labor durations, larger fistulae, more stillbirths, and more vaginal scarring than multipara women [119]. These conditions lead to experiencing a more complicated fistula and an unsuccessful surgical repair outcome in primipara women.

Similarly, women whose labor lasted 48 hours or more were less likely to have a successful surgical repair of the obstetric fistula, which might result from the greater complexity and severity or the injury. This finding is consistent with the result of a systematic review and meta-analysis study conducted in East Africa [25]. The fact that the main cause of obstetric fistula is necrosis of tissue due to occlusion of blood supply to the reproductive and/or lower gastrointestinal tract by the presenting part of the fetus, the more a mother stays in an obstructed labor, the more likely she is to develop a complicated and severe fistula.

This study also reported that women with livebirth neonatal outcomes were more likely to have successful surgical repair than those with stillbirth. The association might be related to longer labor durations with obstructed and more complicated fistulae formation in women with stillbirth than those with livebirth, as evidenced by a systematic review and meta-analysis by Ayenew [120]. Furthermore, since childbirth is a highly anticipated life event for a woman and her family, experiencing a stillbirth imposes psychological distress on the woman [121], leading to unfavorable obstetric fistula surgical repair outcomes.

Regarding fistula size, women with large fistulae (> 3 cm) were less likely to have successful surgical repair as compared to women with fistula sizes less than 3 cm. A systematic review and meta-analysis study reported a similar finding in East Africa [25]. The possible

explanation might be that extensive damage leaves insufficient bladder tissue for a tension-free successful repair [122].

We also examined the association between fistula classification and successful repair outcome, despite the included studies lacking consistency in classification methods. Out of the seven studies included for the examination of the effect of classification on successful repair outcome, three studies used the Goh classification [21,40,44] method and four studies used the Waaldijk classification method [51,52,69,76]. We analyzed the findings of reports in both classifications after categorizing them into Grade II and above, and Grade I. The analysis revealed that women with Grade II and above classifications were less likely to have successful repair outcomes than women with Grade I fistulae. The possible explanation might be that both classification methods depend primarily on anatomic location, fistula size, scarring and vaginal length [123]. Hence, Grade II and above fistulae are more complicated and less likely to have successful surgical repair outcomes than Grade I [124].

In addition, obstetric fistulae accompanied by partial or total urethral damage are less likely to have successful surgical repair outcomes than those with intact urethras. This finding was supported by other studies [25,125]. The negative impact of urethral damage on successful surgical repair outcome might be due to the difficulty of repair in fistula cases complicated by urethral injury, particularly those requiring grafting [126]. Moreover, urethral damage in obstetric fistulae is among the main causes of persistent urinary incontinence due to injury to nerve endings [127]. Similarly, fistulae with circumferential defects were less likely to have a successful surgical repair than those without. This association might be justified similarly to the association with urethral damage because fistulae with circumferential defects are characterized by the destruction of the whole circumference of the bladder and detachment of the urethra from the bladder [128]. Overall, the closure rate of fistulae with urethral damage and circumferential defects may not differ from other types of fistulae, but maintaining functional continence remains the main challenge [129].

Women with moderate and severe forms of vaginal scarring are less likely to have successful repair outcome than women with mild or no scarring. This finding aligns with other systematic review and meta-analysis studies [25,125]. The possible reason might be a lack of vascularization and a poor healing process [130].

Furthermore, women with multiple fistulae and prior repair had a lower chance of successful surgical repair outcome than their counterparts. Other studies [109,126] support these results. In addition, women with postoperative complications are less likely to attain successful surgical repair outcomes than women without complications.

### Limitations of the reviewed studies

Some of the included studies have limitations that impacted the completeness of the data extraction. One of the main limitations was the use of studies that were missing relevant characteristics, mainly the data retrieval period, fistula type, route of repair, and outcome assessment period. These are indicated as unspecified in the study characteristics table. In addition, the included studies lack consistency in measurement and recoding. For instance, many studies have reported 'age' as a determinant variable. However, due to inconsistency in transforming this to a categorical variable, we excluded some of the studies in the meta-analysis in order to the association between age and successful surgical repair outcome.

### Strengths and limitations of this study

This study included a large number of studies and participants and used updated guidelines and manuals. Moreover, the study's title has been registered on PROSPERO, and a protocol

was developed prior to the main review. On the other hand, this study could not exclude non-obstetric cases included in some of the primary studies. In addition, this study excluded studies written in languages other than English and articles without full text, which would contain impactful data.

## Conclusions and recommendations

The rate of successful surgical repair of obstetric fistulae in low and middle-income countries remains low compared to the WHO recommendation. Level of education, marital status, female genital mutilation, parity, neonatal outcome, fistula size, fistula classification, urethral damage, vaginal scarring, circumferential defect, multiple fistulae, prior repair, and postoperative complications are the factors determining the successful surgical repair of obstetric fistulae. Hence, the authors recommend that stakeholders expand maternal healthcare service facilities and staffing in low-resourced settings to avoid long labor hours and provide timely advanced interventions, mainly terminating prolonged labor through cesarean section. The findings of this study also imply that implementing policies that promote women's education enhances the successful surgical repair of obstetric fistulae. Government and non-government stakeholders should strengthen their endeavors to eliminate female genital mutilation, since it remains a significant etiologic and determinant factor for successful treatment outcomes. Fistula care-service providers also need to design and implement strategies to reach out to patients before the health issues become complicated, such as patients developing fibrosis. Finally, further research with advanced designs (a prospective cohort study and randomized controlled trials) and adequate participant numbers would be helpful in identifying the determinants of successful surgical repair. Moreover, the authors would like to recommend the development of a standardized research tool for evaluating successful recovery assessment so that future researchers can use a consistent tool.

## Supporting information

**S1 Checklist. PRISMA 2020 checklist.**

(DOCX)

**S1 Text. Search strategy.**

(DOCX)

**S1 Table. Risk of bias assessment.**

(DOCX)

**S2 Table. Study characteristics.**

(DOCX)

**S1 Data. Data supporting the study.**

(XLSX)

## Acknowledgments

We would like to thank SuperScript Writing and Editing for the assistance.

## Author Contributions

**Conceptualization:** Liknaw Bewket Zeleke, Alec Welsh, Gedefaw Abeje, Marjan Khejahei.

**Data curation:** Liknaw Bewket Zeleke, Alec Welsh, Gedefaw Abeje, Marjan Khejahei.



**Formal analysis:** Liknaw Bewket Zeleke, Alec Welsh, Gedefaw Abeje, Marjan Khejahei.

**Methodology:** Liknaw Bewket Zeleke, Alec Welsh, Gedefaw Abeje, Marjan Khejahei.

**Software:** Liknaw Bewket Zeleke, Gedefaw Abeje, Marjan Khejahei.

**Supervision:** Alec Welsh, Gedefaw Abeje, Marjan Khejahei.

**Writing – original draft:** Liknaw Bewket Zeleke, Marjan Khejahei.

**Writing – review & editing:** Liknaw Bewket Zeleke, Alec Welsh, Gedefaw Abeje, Marjan Khejahei.

## References

1. Chen CCG, Génadry R. Obstetric Fistula. Oxford Research Encyclopedia of Global Public Health 2020.
2. Amber J. Tresca. Fistula Types, Diagnosis, Treatment, and Prognosis 2020 [cited 2020 May 26]. <https://www.verywellhealth.com/what-is-a-fistula-1941776>.
3. Arrowsmith S, Hamlin EC, Wall LL. Obstructed labor injury complex: obstetric fistula formation and the multifaceted morbidity of maternal birth trauma in the developing world. *Obstetrical & gynecological survey*. 1996; 51(9):568–74. <https://doi.org/10.1097/00006254-199609000-00024> PMID: 8873157
4. Miller S, Lester F, Webster M, Cowan B. Obstetric Fistula: A Preventable Tragedy. *Journal of Midwifery & Women's Health*. 2005; 50(4):286–94. <https://doi.org/10.1016/j.jmwh.2005.03.009> PMID: 15973264
5. Melah GS, Massa AA, Yahaya UR, Bukar M, Kizaya DD, El-Nafaty AU. Risk factors for obstetric fistulae in north-eastern Nigeria. *Journal of Obstetrics and Gynaecology*. 2007; 27(8):819–23. <https://doi.org/10.1080/01443610701709825> PMID: 18097903
6. World Health Organization. Obstetric fistula 2018 [updated 19 February 2018]. <https://www.who.int/news-room/facts-in-pictures/detail/10-facts-on-obstetric-fistula#:~:text=Each%20year%20between%2050%20000,of%20maternal%20mortality%3A%20obstructed%20labour>.
7. GlobalGiving. Fast Facts About Fistula 2018 [updated 24 May 2018]. <https://www.globalgiving.org/learn/fast-facts-about-fistula/>.
8. Wall LL. Preventing Obstetric Fistulas in Low-Resource Countries: Insights From a Haddon Matrix. *Obstetrical & Gynecological Survey*. 2012; 67(2). <https://doi.org/10.1097/OGX.0b013e3182438788> PMID: 22325301
9. Shefren JM. The tragedy of obstetric fistula and strategies for prevention. *American Journal of Obstetrics & Gynecology*. 2009; 200(6):668–71. <https://doi.org/10.1016/j.ajog.2009.03.008> PMID: 19376492
10. Gebremedhin S, Asefa A. Treatment-seeking for vaginal fistula in sub-Saharan Africa. *Plos one*. 2019; 14(11):e0216763. <https://doi.org/10.1371/journal.pone.0216763> PMID: 31675379
11. Lyimo MA, Mosha IH. Reasons for delay in seeking treatment among women with obstetric fistula in Tanzania: a qualitative study. *BMC Womens Health*. 2019; 19(1):93. <https://doi.org/10.1186/s12905-019-0799-x> PMID: 31291928
12. Barageine JK, Beyeza-Kashesya J, Byamugisha JK, Tumwesigye NM, Almroth L, Faxelid E. "I am alone and isolated": a qualitative study of experiences of women living with genital fistula in Uganda. *BMC Womens Health*. 2015; 15:73. <https://doi.org/10.1186/s12905-015-0232-z> PMID: 26359255
13. Khisa AM, Omoni GM, Nyamongo IK, Spitzer RF. 'I stayed with my illness': a grounded theory study of health seeking behaviour and treatment pathways of patients with obstetric fistula in Kenya. *BMC Womens Health*. 2017; 17(1):92. <https://doi.org/10.1186/s12905-017-0451-6> PMID: 28962566
14. Pope R, Bangser M, Requejo JH. Restoring dignity: Social reintegration after obstetric fistula repair in Ukerewe, Tanzania. *Global Public Health*. 2011; 6(8):859–73. <https://doi.org/10.1080/17441692.2010.551519> PMID: 21390964
15. Tayler-Smith K, Zachariah R, Manzi M, van den Boogaard W, Vandeborne A, Bishinga A, et al. Obstetric Fistula in Burundi: a comprehensive approach to managing women with this neglected disease. *BMC Pregnancy and Childbirth*. 2013; 13(1):164. <https://doi.org/10.1186/1471-2393-13-164> PMID: 23965150
16. Neogi S, Negandhi H, Bharti P, Zodpey S, Mathur A. Burden and management of obstetric fistula in South-East Asian region countries: A systematic review and meta-analysis. *Indian Journal of Public Health*. 2020; 64(4):386–92. [https://doi.org/10.4103/ijph.IJPH\\_200\\_20](https://doi.org/10.4103/ijph.IJPH_200_20) PMID: 33318390

17. Hillary CJ, Chapple CR. The choice of surgical approach in the treatment of vesico-vaginal fistulae. *Asian Journal of Urology*. 2018; 5(3):155–9. <https://doi.org/10.1016/j.ajur.2018.01.002> PMID: [29988887](https://pubmed.ncbi.nlm.nih.gov/29988887/)
18. Bernard L, Giles A, Fabiano S, Giles S, Hudgins S, Olson A, et al. Predictors of Obstetric Fistula Repair Outcomes in Lubango, Angola. *Journal of Obstetrics and Gynaecology Canada*. 2019; 41(12):1726–33. <https://doi.org/10.1016/j.jogc.2019.01.025> PMID: [30987849](https://pubmed.ncbi.nlm.nih.gov/30987849/)
19. Purkait B, Mehrotra S, Sinha RJ, Bhaskar V, Singh V. Long-term outcome of laparoscopic vesicouterine fistula repair: Experience from a tertiary referral centre. *Turkish Journal of Urology*. 2017; 43(4):512–6. <https://doi.org/10.5152/tud.2017.45389> PMID: [29201517](https://pubmed.ncbi.nlm.nih.gov/29201517/)
20. Sori DA, Azale AW, Gemeda DH. Characteristics and repair outcome of patients with Vesicovaginal fistula managed in Jimma University teaching Hospital, Ethiopia. *BMC Urology*. 2016; 16(1):41. <https://doi.org/10.1186/s12894-016-0152-8> PMID: [27406310](https://pubmed.ncbi.nlm.nih.gov/27406310/)
21. Aynie A, Yihunie A, Mekonnen A. Magnitude of repair failure and associated factors among women undergone obstetric fistula repair in Bahir Dar Hamlin Fistula Center, Amhara Region, Northwest Ethiopia. *International Journal of Scientific Reports*. 2019; 5:324.
22. Egziabher TG, Eugene N, Ben K, Fredrick K. Obstetric fistula management and predictors of successful closure among women attending a public tertiary hospital in Rwanda: a retrospective review of records. *BMC Research Notes*. 2015; 8(1):774. <https://doi.org/10.1186/s13104-015-1771-y> PMID: [26654111](https://pubmed.ncbi.nlm.nih.gov/26654111/)
23. Kayondo M, Wasswa S, Kabakyenga J, Mukiibi N, Senkungu J, Stenson A, et al. Predictors and outcome of surgical repair of obstetric fistula at a regional referral hospital, Mbarara, western Uganda. *BMC Urology*. 2011; 11(1):23.
24. Delamou A, Diallo M, Beavogui AH, Delvaux T, Millimono S, Kourouma M, et al. Good clinical outcomes from a 7-year holistic programme of fistula repair in Guinea. *Tropical Medicine and International Health*. 2015; 20(6):813–9. <https://doi.org/10.1111/tmi.12489> PMID: [25706671](https://pubmed.ncbi.nlm.nih.gov/25706671/)
25. Ejigu N, Seyoum K, Kene C, Gomora D, Mengistu S, Geta G, et al. Prevalence and associated risk factors for failed obstetric fistula repair in East African countries: A systematic review and meta-analysis. *SAGE Open Medicine*. 2023; 11:20503121231187742. <https://doi.org/10.1177/20503121231187742> PMID: [37492647](https://pubmed.ncbi.nlm.nih.gov/37492647/)
26. Kumsa H, Mislue E, Arage MW, Abera A, Hailu T, Tenaw LA. Successful surgical closure and continence rate of obstetric fistula in Africa: systematic review and meta-analysis. *Frontiers in Global Women's Health*. 2023; 4. <https://doi.org/10.3389/fgwh.2023.1188809> PMID: [37854165](https://pubmed.ncbi.nlm.nih.gov/37854165/)
27. Shamseer L, Moher D, Clarke M, Ghersi D, Liberati A, Petticrew M, et al. Preferred reporting items for systematic review and meta-analysis protocols (PRISMA-P) 2015: elaboration and explanation. *BMJ: British Medical Journal*. 2015; 349:g7647. <https://doi.org/10.1136/bmj.g7647> PMID: [25555855](https://pubmed.ncbi.nlm.nih.gov/25555855/)
28. Munn Z, Moola S, Lisy K, Riitano D, Tufanaru C. Methodological guidance for systematic reviews of observational epidemiological studies reporting prevalence and cumulative incidence data. *JBIC Evidence Implementation*. 2015; 13(3).
29. Kelly J, Kwast B. Epidemiologic study of vesicovaginal fistulas in Ethiopia. *International Urogynecology Journal*. 1993; 4:278–81.
30. Moola S, Munn Z, Tufanaru C, Aromataris E, Sears K, Sfec R, et al. Chapter 7: Systematic Reviews of Etiology and Risk. *JBIC Manual for Evidence Synthesis*. 2020.
31. Lo CK-L, Mertz D, Loeb M. Newcastle-Ottawa Scale: comparing reviewers' to authors' assessments. *BMC Medical Research Methodology*. 2014; 14(1):45. <https://doi.org/10.1186/1471-2288-14-45> PMID: [24690082](https://pubmed.ncbi.nlm.nih.gov/24690082/)
32. Ma L-L, Wang Y-Y, Yang Z-H, Huang D, Weng H, Zeng X-T. Methodological quality (risk of bias) assessment tools for primary and secondary medical studies: what are they and which is better? *Military Medical Research*. 2020; 7(1):7. <https://doi.org/10.1186/s40779-020-00238-8> PMID: [32111253](https://pubmed.ncbi.nlm.nih.gov/32111253/)
33. Assessing Schulzke S. and Heterogeneity Exploring. In: Patole S, editor. *Principles and Practice of Systematic Reviews and Meta-Analysis*. Cham: Springer International Publishing; 2021. p. 33–41.
34. Gezimu W, Sime T, Diriba A, Gemechu D. Repair failure and associated factors among women who underwent obstetric fistula surgery in Southwest Ethiopia: A retrospective study. *Women's Health*. 2023; 19:17455057231192325. <https://doi.org/10.1177/17455057231192325> PMID: [37596930](https://pubmed.ncbi.nlm.nih.gov/37596930/)
35. Traore TM, Ouedraogo S, Kabore M, Traore JJ. Characteristics of obstetric urogenital fistulas in a regional teaching hospital in Burkina Faso: a retrospective cross-sectional study. *Pan Afr Med J*. 2023; 44:105. <https://doi.org/10.11604/pamj.2023.44.105.35733> PMID: [37250682](https://pubmed.ncbi.nlm.nih.gov/37250682/)
36. Kumsa Meikena H, Bihon AM, Serka S. Predictors and outcomes of surgical repair of obstetric fistula at Mekelle Hamlin Fistula Center, Northern Ethiopia. *International Urogynecology Journal*. 2023. <https://doi.org/10.1007/s00192-023-05483-8> PMID: [36786855](https://pubmed.ncbi.nlm.nih.gov/36786855/)

37. Niragira J, Wang TX. Treatment of Vesico-Vaginal Fistula by General Practitioners trained in Fistula Repair owing to a lack of surgeons in rural areas in Burundi. *Tropical Doctor*. 2023; 53(2):207–9. <https://doi.org/10.1177/00494755221144669> PMID: 36567630
38. Patel TB, Nisarata HR, Patel VK, Wagh MR. Obstetric Fistula Surgery: Indicators of Recurrence and Successful Treatment. *Research Journal of Medical Sciences*. 2023; 17(4):445–9.
39. Ambese TY, Gebre H, Berhe A, Fisseha G, Gufue ZH, Hailu NA, et al. Effect of vaginal scarring on the recovery of surgical repair of obstetric fistula in Northern Ethiopia. *International Journal of Gynecology & Obstetrics*. 2023; 160(3):915–25. <https://doi.org/10.1002/ijgo.14425> PMID: 36031398
40. Tadesse S, Ejigu N, Edosa D, Ashegu T, Dulla D. Obstetric fistula repair failure and its associated factors among women underwent repair in Yirgalem Hamlin fistula center, Sidama Regional State, Southern Ethiopia, 2021: a retrospective cross sectional study. *BMC Women's Health*. 2022; 22(1):288. <https://doi.org/10.1186/s12905-022-01866-z> PMID: 35811314
41. Asif M, Abrar S, Abrar T. Causative factors, social and surgical outcomes of vesicovaginal fistulas treated via an abdominal transvesical approach: A single-center experience. *International Journal of Gynecology and Obstetrics*. 2023; 160(1):209–13. <https://doi.org/10.1002/ijgo.14328> PMID: 35780476
42. Mafu MM, Banze DFK, Aussak BTT, Kolié D, Camara BS, Nembunzu D, et al. Factors associated with surgical repair success of female genital fistula in the Democratic Republic of Congo: Experiences of the Fistula Care Plus Project, 2017–2019. *Tropical Medicine & International Health*. 2022; 27(9):831–9. <https://doi.org/10.1111/tmi.13794> PMID: 35749231
43. Areba AS, Akessa GM, Tadesse M, Haile A, Abire BG, Eritero AC, et al. Recovery Time and Its Predictors among Women Admitted with Obstetric Fistula in Jimma University Medical Center Southwest, Ethiopia: A Retrospective Cohort Study. *medRxiv*. 2022.
44. Holt L, Potluri T, Tanner JP, Duffy S, Wasingya L, Greene K. Risk factors for early and late failures following repair of urogenital fistulas. *International Urogynecology Journal*. 2021; 32(9):2473–82. <https://doi.org/10.1007/s00192-020-04606-9> PMID: 33416963
45. Kabore FA, Nama SDA, Ouedraogo B, Kabore M, Ouattara A, Kirakoya B, et al. Characteristics of Obstetric and Iatrogenic Urogenital Fistulas in Burkina Faso: A Cross-Sectional Study. *Advances in Urology*. 2021; 2021((Kabore, Nama, Kabore, Kirakoya) Department of Urology and Andrology, University Hospital Yalgado Ouedraogo of Ouagadougou, Ouagadougou, Burkina Faso(Ouedraogo) Urology Department, University Hospital of Tingandogo, Tingandogo, Burkina Faso(Ouattara) Urol):8838146. <https://doi.org/10.1155/2021/8838146> PMID: 33531896
46. Sharma E, Iqbal M, Masood S. Five-Year Retrospective Study on the Management of Vesicovaginal Fistula from a Tertiary Care Centre of Jammu. *JK Science*. 2021; 23(4):191–4.
47. Sereke D, Hailemelecot H, Issak Y, Estifanose D. Obstetric Vesico-vaginal Fistulae: A Documentary Review of Women Managed in Mendefera Zonal Referral and National Fistula Hospital, Eritrea. *Science*. 2020; 8(5):149–54.
48. Derso EA, Ayalew S, Eshete A, Wale M. Determinants of time to recovery from obstetric fistula by using the data of university of Gondar teaching hospital fistula center, Gondar -Ethiopia: A parametric survival regression analysis. *Cogent Medicine*. 2020; 7(1):1816259.
49. Benski AC, Delavy M, Rochat CH, Viviano M, Catarino R, Elsig V, et al. Prognostic factors and long-term outcomes of obstetric fistula care using the Tanguiéta model. *International Journal of Gynecology & Obstetrics*. 2020; 148(3):331–7.
50. Yismaw L, Alemu K, Addis A, Alene M. Time to recovery from obstetric fistula and determinants in Gondar university teaching and referral hospital, northwest Ethiopia. *BMC Womens Health*. 2019; 19(1):5. <https://doi.org/10.1186/s12905-018-0700-3> PMID: 30616532
51. Okunola TO, Yakubu E, Daniyan B, Ekwedigwe K, Eliboh M, Sunday-Adeoye I. Profile and outcome of patients with recurrent urogenital fistula in a fistula centre in Nigeria. *International Urogynecology Journal*. 2019; 30(2):197–201. <https://doi.org/10.1007/s00192-018-3738-8> PMID: 30097667
52. Mwangi HR, Wang'ombe A, Mabeya H, Kipruto H, Wanjala A. Factors associated with obstetric fistula repair failure among women admitted at Gynocare Women's and Fistula Hospital in Kenya, 2012–2016: a case control study. *Nepal Journal of Obstetrics and Gynaecology*. 2018; 13(2).
53. Ojewola RW, Tijani KH, Jeje EA, Ogunjimi MA, Animashaun EA, Akanmu ON. Transabdominal repair of vesicovaginal fistulae: A 10-year tertiary care hospital experience in Nigeria. *The Nigerian postgraduate medical journal*. 2018; 25(4):213–9. [https://doi.org/10.4103/npmj.npmj\\_154\\_18](https://doi.org/10.4103/npmj.npmj_154_18) PMID: 30588941
54. McCurdie FK, Moffatt J, Jones K. Vesicovaginal fistula in Uganda. *Journal of Obstetrics and Gynaecology*. 2018; 38(6):822–7. <https://doi.org/10.1080/01443615.2017.1407301> PMID: 29523027
55. Ali W, Kharal IA, Ijaz I, Younis M. Outcome of transvaginal vesicovaginal fistula repair with martius fat pad flap in comparison to simple closure. *Pak J Med Health Sci*. 2018; 12(3):1126–8.

56. Mubikayi L, Matson DO, Lokomba V, Mboloko J, Kamba JP, Tozin R. Determinants of Outcomes and Prognosis Score in Obstetric Vesico-Vaginal Fistula Repair. *Open Journal of Obstetrics and Gynecology*. 2017;Vol. 07No.07:11.
57. Quedraogo I, Payne C, Nardos R, Adelman AJ, Wall LL. Obstetric fistula in Niger: 6-month postoperative follow-up of 384 patients from the Danja Fistula Center. *International Urogynecology Journal*. 2018; 29(3):345–51. <https://doi.org/10.1007/s00192-017-3375-7> PMID: 28600757
58. Hussien S, Melese E. Time-to-recovery from obstetric fistula and associated factors: The case of Harar Hamlin Fistula Center. *Ethiopian J Health Dev*. 2017; 31(2):85–95.
59. Heller A. Demographic profile and treatment outcomes of 100 women with obstetric fistula in Niger. *Proceedings in Obstetrics and Gynecology*. 2017; 7:1–15.
60. Priyadarshi V, Singh JP, Bera MK, Kundu AK, Pal DK. Genitourinary Fistula: An Indian Perspective. *J Obstet Gynaecol India*. 2016; 66(3):180–4. <https://doi.org/10.1007/s13224-015-0672-2> PMID: 27298528
61. Loposso M, Hakim L, Ndundu J, Lufuma S, Punga A, De Ridder D. Predictors of Recurrence and Successful Treatment Following Obstetric Fistula Surgery. *Urology*. 2016; 97:80–5. <https://doi.org/10.1016/j.urology.2016.03.079> PMID: 27496296
62. Delamou A, Delvaux T, Beavogui AH, Toure A, Kolié D, Sidibé S, et al. Factors associated with the failure of obstetric fistula repair in Guinea: implications for practice. *Reproductive Health*. 2016; 13(1):135. <https://doi.org/10.1186/s12978-016-0248-3> PMID: 27821123
63. Paluku JL, Carter TE. Obstetric vesico-vaginal fistulae seen in the Northern Democratic Republic of Congo: a descriptive study. *Afr Health Sci*. 2015; 15(4):1104–11. <https://doi.org/10.4314/ahs.v15i4.8> PMID: 26958010
64. Egziabher TG, Eugene N, Ben K, Fredrick K. Obstetric fistula management and predictors of successful closure among women attending a public tertiary hospital in Rwanda: a retrospective review of records. *BMC research notes*. 2015; 8:774. <https://doi.org/10.1186/s13104-015-1771-y> PMID: 26654111
65. Browning A, Whiteside S. Characteristics, management, and outcomes of repair of rectovaginal fistula among 1100 consecutive cases of female genital tract fistula in Ethiopia. *Int J Gynaecol Obstet*. 2015; 131(1):70–3. <https://doi.org/10.1016/j.ijgo.2015.05.012> PMID: 26233699
66. Tebeu PM, Maninzou SD, Takam D, Nguéfack-Tsague G, Fomulu JN, Rochat CH. Surgical outcome following treatment of obstetric vesicovaginal fistula among HIV-positive and HIV-negative patients in Cameroon. *International Journal of Gynecology and Obstetrics*. 2014; 125(2):168–9. <https://doi.org/10.1016/j.ijgo.2013.10.029> PMID: 24629787
67. Ahmed Z, Abdullahi H, Yola A, Yakasai I. Obstetrics fistula repairs in Kano, Northern Nigeria: The journey so far. *Annals of Tropical Medicine and Public Health*. 2013; 6(5):545–8.
68. Tebeu PM, Fosso GK, Vadandi V, Dohbit JS, Fomulu JN, Rochat CH. Prognostic value of repeated surgery on obstetric vesico-vaginal fistula outcome: A Cameroonian experience. *Asian Pacific Journal of Reproduction*. 2013; 2(4):330–2.
69. Hawkins L, Spitzer RF, Christoffersen-Deb A, Leah J, Mabeya H. Characteristics and surgical success of patients presenting for repair of obstetric fistula in western Kenya. *International Journal of Gynecology & Obstetrics*. 2013; 120(2):178–82. <https://doi.org/10.1016/j.ijgo.2012.08.014> PMID: 23141371
70. Siddle K, Vieren L, Fiander A. Characterising women with obstetric fistula and urogenital tract injuries in Tanzania. *International Urogynecology Journal*. 2014; 25(2):249–55. <https://doi.org/10.1007/s00192-013-2185-9> PMID: 23903820
71. Barone M, Frajzyngier V, Ruminjo J, Asiimwe F, Hamidou Barry T, Bello A, et al. Determinants of fistula repair post-operative outcomes: A prospective cohort study. *International Journal of Gynecology and Obstetrics*. 2012; 119(SUPPL. 3):S167.
72. Gupta NP, Mishra S, Mishra A, Seth A, Anand A. Outcome of repeat supratrigonal obstetric vesicovaginal fistula repair after previous failed repair. *Urologia Internationalis*. 2012; 88(3):259–62. <https://doi.org/10.1159/000331503> PMID: 22414630
73. Frajzyngier V, Ruminjo J, Asiimwe F, Barry TH, Bello A, Danladi D, et al. Factors influencing choice of surgical route of repair of genitourinary fistula, and the influence of route of repair on surgical outcomes: findings from a prospective cohort study. *BJOG: An International Journal of Obstetrics & Gynaecology*. 2012; 119(11):1344–53. <https://doi.org/10.1111/j.1471-0528.2012.03461.x> PMID: 22900837
74. Abdullah A, Javed A, Syed S, Farooqui N. Doctor, will i be dry? factors determining recurrence after vesicovaginal fistula repair. *Urology*. 2012; 80(3 SUPPL. 1):S146–S7.
75. Singh V, Sinha RJ, Sankhwar SN, Sinha SM, Vatsal P, Jain V. Transvaginal repair of complex and complicated vesicovaginal fistulae. *International Journal of Gynecology and Obstetrics*. 2011; 114(1):51–5. <https://doi.org/10.1016/j.ijgo.2011.01.015> PMID: 21529805

76. Kayondo M, Wasswa S, Kabakyenga J, Mukiibi N, Senkungu J, Stenson A, et al. Predictors and outcome of surgical repair of obstetric fistula at a regional referral hospital, Mbarara, western Uganda. *BMC Urology*. 2011; 11(1):23-.
77. Sjoveian S, Vangen S, Mukwege D, Onsrud M. Surgical outcome of obstetric fistula: A retrospective analysis of 595 patients. *Acta Obstetrica et Gynecologica Scandinavica*. 2011; 90(7):753–60. <https://doi.org/10.1111/j.1600-0412.2011.01162.x> PMID: 21542810
78. Munoz O, Bowling CB, Gerten KA, Taryor R, Norman AM, Szychowski JM, et al. Factors influencing post-operative short-term outcomes of vesicovaginal fistula repairs in a community hospital in Liberia. *British Journal of Medical and Surgical Urology*. 2011; 4(6):259–65. <https://doi.org/10.1016/j.bjmsu.2011.02.001> PMID: 22229049
79. McFadden E, Taleski SJ, Bocking A, Spitzer RF, Mabeya H. Retrospective review of predisposing factors and surgical outcomes in obstetric fistula patients at a single teaching hospital in Western Kenya. *Journal of obstetrics and gynaecology Canada: JOGC = Journal d'obstetrique et gynecologie du Canada: JOGC*. 2011; 33(1):30–5. [https://doi.org/10.1016/S1701-2163\(16\)34769-7](https://doi.org/10.1016/S1701-2163(16)34769-7) PMID: 21272433
80. Mathur R, Joshi N, Aggarwal G, Raikwar R, Shrivastava V, Mathur P, et al. Urogenital fistulae: A prospective study of 50 cases at a tertiary care hospital. *Urol Ann*. 2010; 2(2):67–70. <https://doi.org/10.4103/0974-7796.65114> PMID: 20882157
81. Sachdev PS, Hassan N, Abbasi RM, Das CM. Genito-urinary fistula: a major morbidity in developing countries. *Journal of Ayub Medical College, Abbottabad: JAMC*. 2009; 21(2):8–11. PMID: 20524458
82. Nielsen HS, Lindberg L, Nygaard U, Aytenfisu H, Johnston OL, Sørensen B, et al. A community-based long-term follow up of women undergoing obstetric fistula repair in rural Ethiopia. *BJOG: An International Journal of Obstetrics & Gynaecology*. 2009; 116(9):1258–64. <https://doi.org/10.1111/j.1471-0528.2009.02200.x> PMID: 19459865
83. Nardos R, Browning A, Chen CCG. Risk factors that predict failure after vaginal repair of obstetric vesicovaginal fistulae. *American Journal of Obstetrics and Gynecology*. 2009; 200(5):578.e1-.e4. <https://doi.org/10.1016/j.ajog.2008.12.008> PMID: 19200932
84. Singh S, Chandhiok N, Singh Dhillon B. Obstetric fistula in India: current scenario. *International urogynecology journal and pelvic floor dysfunction*. 2009; 20(12):1403–5. <https://doi.org/10.1007/s00192-009-1000-0> PMID: 19789831
85. Ezzat M, Ezzat MM, Tran VQ, Aboseif SR. Repair of giant vesicovaginal fistulas. *J Urol*. 2009; 181(3):1184–8. <https://doi.org/10.1016/j.juro.2008.10.152> PMID: 19152944
86. Raassen TJIP Verdaasdonk EGG, Vierhout ME. Prospective results after first-time surgery for obstetric fistulas in East African women. *International Urogynecology Journal*. 2008; 19(1):73–9.
87. Shafqat T, Faiz NR, Haleemi M. PROFILE AND REPAIR SUCCESS OF VESICOVAGINAL FISTULA IN NWFP. *Journal of Postgraduate Medical Institute*. 2009; 23(1).
88. Goh JTW, Browning A, Berhan B, Chang A. Predicting the risk of failure of closure of obstetric fistula and residual urinary incontinence using a classification system. *International Urogynecology Journal*. 2008; 19(12):1659–62. <https://doi.org/10.1007/s00192-008-0693-9> PMID: 18690403
89. Browning A, Menber B. Women with obstetric fistula in Ethiopia: A 6-month follow up after surgical treatment. *BJOG: An International Journal of Obstetrics and Gynaecology*. 2008; 115(12):1564–9. <https://doi.org/10.1111/j.1471-0528.2008.01900.x> PMID: 19035992
90. Uprety DK, Subedi S, Budhathoki B, Regmi MC. Vesicovaginal fistula at tertiary care center in eastern Nepal. *Journal of the Nepal Medical Association*. 2008; 47(171):120–2. PMID: 19079375
91. Nafiou I, Idrissa A, Ghaïchatou AK, Roenneburg ML, Wheelless CR, Genadry RR. Obstetric vesicovaginal fistulas at the National Hospital of Niamey, Niger. *Int J Gynaecol Obstet*. 2007; 99 Suppl 1: S71–4. <https://doi.org/10.1016/j.ijgo.2007.06.012> PMID: 17727853
92. Holme A, Breen M, MacArthur C. Obstetric fistulae: A study of women managed at the Monze Mission Hospital, Zambia. *BJOG: An International Journal of Obstetrics and Gynaecology*. 2007; 114(8):1010–7. <https://doi.org/10.1111/j.1471-0528.2007.01353.x> PMID: 17506793
93. Al-Beiti MAM, Lu X. Genital tract fistulae in the Republic of Yemen, Sana'a. *Journal of Medical Sciences*. 2007; 7(3):473–9.
94. Roenneburg ML, Genadry R, Wheelless CR Jr. Repair of obstetric vesicovaginal fistulas in Africa. *Am J Obstet Gynecol*. 2006; 195(6):1748–52. <https://doi.org/10.1016/j.ajog.2006.07.031> PMID: 17132477
95. Husain A, Johnson K, Glowacki CA, Osias J, Wheelless CR Jr, Asrat K, et al. Surgical management of complex obstetric fistula in Eritrea. *Journal of Women's Health*. 2005; 14(9):839–44. <https://doi.org/10.1089/jwh.2005.14.839> PMID: 16313211
96. Ahmad S, Nishtar A, Hafeez GA, Khan Z. Management of vesico-vaginal fistulas in women. *Int J Gynaecol Obstet*. 2005; 88(1):71–5. <https://doi.org/10.1016/j.ijgo.2004.08.021> PMID: 15617716

97. Naru T, Rizvi JH, Talati J. Surgical repair of genital fistulae. *Journal of Obstetrics and Gynaecology Research*. 2004; 30(4):293–6. <https://doi.org/10.1111/j.1447-0756.2004.00196.x> PMID: 15238105
98. Rafique M. Genitourinary fistulas of obstetric origin. *Int Urol Nephrol*. 2002; 34(4):489–93. <https://doi.org/10.1023/a:1025679205541> PMID: 14577490
99. Rangnekar NP, Imdad Ali N, Kaul SA, Pathak HR. Role of the martins procedure in the management of urinary-vaginal fistulas. *J Am Coll Surg*. 2000; 191(3):259–63.
100. Kelly J. Vesico-vaginal and recto-vaginal fistulae. *J Obstet Gynaecol*. 1998; 18(3):249–51. <https://doi.org/10.1080/01443619867425> PMID: 15512070
101. Hilton P, Ward A. Epidemiological and surgical aspects of urogenital fistulae: A review of 25 years' experience in southeast nigeria. *International Urogynecology Journal*. 1998; 9(4):189–94. <https://doi.org/10.1007/BF01901602> PMID: 9795822
102. Elkins TE. Surgery for the obstetric vesicovaginal fistula: a review of 100 operations in 82 patients. *Am J Obstet Gynecol*. 1994; 170(4):1108–18; discussion 18. [https://doi.org/10.1016/s0002-9378\(94\)70105-9](https://doi.org/10.1016/s0002-9378(94)70105-9) PMID: 8166194
103. Raut V, Bhattacharya M. Vesical fistulae—an experience from a developing country. *J Postgrad Med*. 1993; 39(1):20–1. PMID: 8295139
104. Wadhawan S, Wacha DS. A review of urinary fistulae in a university teaching hospital. *Int J Gynaecol Obstet*. 1983; 21(5):381–5. [https://doi.org/10.1016/0020-7292\(83\)90005-x](https://doi.org/10.1016/0020-7292(83)90005-x) PMID: 6141096
105. Kelly J. Vesicovaginal Fistulae. *Br J Urol*. 1979; 51(3):208–10. <https://doi.org/10.1111/j.1464-410x.1979.tb02868.x> PMID: 465988
106. Rao KBMDGO. Urinary Fistulae of Obstetric Origin. *J Obstet Gynaecol Res*. 1971; 2(2):81–3.
107. Wall LL. A Framework for Analyzing the Determinants of Obstetric Fistula Formation. *Studies in Family Planning*. 2012; 43(4):255–72. <https://doi.org/10.1111/j.1728-4465.2012.00325.x> PMID: 23239246
108. de Bernis L. Obstetric fistula: Guiding principles for clinical management and programme development, a new WHO guideline. *International Journal of Gynecology & Obstetrics*. 2007; 99(S1):S117–S21. <https://doi.org/10.1016/j.ijgo.2007.06.032> PMID: 17880979
109. Nalubwama H, El Ayadi AM, Barageine JK, Byamugisha J, Kakaire O, Obore S, et al. Perceived Causes of Obstetric Fistula and Predictors of Treatment Seeking among Ugandan Women: Insights from Qualitative Research. *Afr J Reprod Health*. 2020; 24(2):129–40. <https://doi.org/10.29063/ajrh2020/v24i2.13> PMID: 34077099
110. Ekanem EI, Ekott MI, Ekabua JE, Agan TU, Inyang-Otu A. Outcome of management of obstetric genito-urinary fistulae in the General Hospital, Ikot Ekpene, Akwa Ibom state, Nigeria. *Urogynaecol Int J*. 2010; 24(2–3).
111. Aynalem GL, Kassie BA, Baye C, Tamiru AT, Anteneh KT, Berhe A, et al. Long-Term Effects of Obstetric Fistula on the Overall Quality of Life among Survivors Who Had Undergone Obstetric Fistula Repair, Central Gondar Zone, Northwest Ethiopia, 2020: A Community-Based Study. *Rehabilitation Research and Practice*. 2022; 2022:6703409. <https://doi.org/10.1155/2022/6703409> PMID: 35178255
112. Hurissa BF, Koricha ZB, Dadi LS. Quality of life and its predictive factors among women with obstetric fistula in Ethiopia: A cross-sectional study. *Frontiers in Public Health*. 2022; 10. <https://doi.org/10.3389/fpubh.2022.987659> PMID: 36388323
113. Khisa AM Nyamongo K.I. What factors contribute to obstetric fistulae formation in rural Kenya? *African Journal of Midwifery and Women's Health*. 2011; 5(2):95–100.
114. Dennis Juma M, Pooja S, Charity N. Is there a relationship between female genital mutilation/cutting and fistula? A statistical analysis using cross-sectional data from Demographic and Health Surveys in 10 sub-Saharan Africa countries. *BMJ Open*. 2019; 9(7):e025355. <https://doi.org/10.1136/bmjopen-2018-025355> PMID: 31362960
115. Varol N, Dawson A, Turkmani S, Hall JJ, Nanayakkara S, Jenkins G, et al. Obstetric outcomes for women with female genital mutilation at an Australian hospital, 2006–2012: a descriptive study. *BMC Pregnancy and Childbirth*. 2016; 16(1):328. <https://doi.org/10.1186/s12884-016-1123-5> PMID: 27793119
116. Elduma AH. Female Genital Mutilation in Sudan. *Open Access Maced J Med Sci*. 2018; 6(2):430–4. <https://doi.org/10.3889/oamjms.2018.099> PMID: 29531618
117. Banks E, Meirik O, Farley T, Akande O, Bathija H, Ali M. Female genital mutilation and obstetric outcome: WHO collaborative prospective study in six African countries. *Lancet*. 2006; 367(9525):1835–41. [https://doi.org/10.1016/S0140-6736\(06\)68805-3](https://doi.org/10.1016/S0140-6736(06)68805-3) PMID: 16753486
118. Lorencz E, Galvin SL, Browning A, Krause H, Goh J. Parity as a predictor of obstetric fistula classification. *International Urogynecology Journal*. 2017; 28(6):941–5. <https://doi.org/10.1007/s00192-016-3197-z> PMID: 27826639

119. Muleta M, Rasmussen S, Kiserud T. Obstetric fistula in 14,928 Ethiopian women. *Acta Obstet Gynecol Scand.* 2010; 89(7):945–51. <https://doi.org/10.3109/00016341003801698> PMID: 20397760
120. Ayenew AA. Incidence, causes, and maternofetal outcomes of obstructed labor in Ethiopia: systematic review and meta-analysis. *Reproductive Health.* 2021; 18(1):61.
121. Tolossa T, Fetensa G, Yilma MT, Abadiga M, Wakuma B, Besho M, et al. Postpartum depression and associated factors among postpartum women in Ethiopia: a systematic review and meta-analysis, 2020. *Public Health Reviews.* 2020; 41(1):21. <https://doi.org/10.1186/s40985-020-00136-3> PMID: 32974057
122. Pope R, Beddow M. A review of surgical procedures to repair obstetric fistula. *International Journal of Gynecology & Obstetrics.* 2020; 148(S1):22–6.
123. Goh JTW. A new classification for female genital tract fistula. *Australian and New Zealand Journal of Obstetrics and Gynaecology.* 2004; 44(6):502–4. <https://doi.org/10.1111/j.1479-828X.2004.00315.x> PMID: 15598284
124. Goh JT, Browning A, Berhan B, Chang A. Predicting the risk of failure of closure of obstetric fistula and residual urinary incontinence using a classification system. *Int Urogynecol J Pelvic Floor Dysfunct.* 2008; 19(12):1659–62. <https://doi.org/10.1007/s00192-008-0693-9> PMID: 18690403
125. Frajzyngier V, Ruminjo J, Barone MA. Factors influencing urinary fistula repair outcomes in developing countries: a systematic review. *American Journal of Obstetrics and Gynecology.* 2012; 207(4):248–58. <https://doi.org/10.1016/j.ajog.2012.02.006> PMID: 22475385
126. Genadry RR, Creanga AA, Roenneburg ML, Wheeless CR. Complex obstetric fistulas. *International Journal of Gynecology & Obstetrics.* 2007; 99(S1):S51–S6. <https://doi.org/10.1016/j.ijgo.2007.06.026> PMID: 17765241
127. Lawal OO, Abdus-salam RA, Bello OO, Morhason-Bello IO, Ojengbede OA. Outcome of urethral reconstruction among vesico-vaginal fistula patients: a cross-sectional study. *African Journal of Urology.* 2021; 27(1):44.
128. Browning A. Short communication: The circumferential obstetric fistula: characteristics, management and outcomes. *BJOG: An International Journal of Obstetrics & Gynaecology.* 2007; 114(9):1172–6.
129. Ashwin Shekar P, Dumra A, Pal BC, Gopalakrishnan G. Complex circumferential obstetric fistula—a urologist's worst nightmare. *International Urogynecology Journal.* 2021; 32(7):1755–9. <https://doi.org/10.1007/s00192-020-04398-y> PMID: 32577790
130. Kirschner CV, Yost KJ, Du H, Karshima JA, Arrowsmith SD, Wall LL. Obstetric fistula: the ECWA Evangel VVF Center surgical experience from Jos, Nigeria. *International Urogynecology Journal.* 2010; 21(12):1525–33. <https://doi.org/10.1007/s00192-010-1231-0> PMID: 20700729
